# Supplementary material for: Validation of enhanced kinect sensor based motion capturing for gait assessment
Source: PubMed Central journal article supplement (PMC5391956; doi:10.1371/journal.pone.0175813), 2017-04-14
Supplement: pone.0175813.s001.pdf [file pone.0175813.s001.pdf]

## Calculations for spatial calibration

We have modeled the problem of finding a transformation from any sensor coordinate frame to the coordinate frame of the first marker as path finding problem in a bipartite undirected graph  $G = (V, E)$  with  $V = M \cup S$ ,  $M \cap S = \emptyset$  and  $E = \{(s, m) \in S \times M, (m, s) \in M \times S \mid \text{"sensor } s \text{ sees marker } m"\}$  where  $M$  denotes the set of all markers and  $S$  the set of all sensors. We define the relation “s can see m indirectly” as “there is a path in  $G$  from  $s$  to  $m$ ”. Here we outline proofs for the following two claims: (1)  $G$  is connected  $\Leftrightarrow \forall s \in S \forall m \in M : s$  can see  $m$  (indirectly) and (2)  $\exists$  path  $p$  from  $s \in S$  to  $m \in M$  in  $G \Rightarrow$  the position and orientation of sensor  $s$  can be expressed relative to marker  $m$ .

Proof of claim 1 (by contradiction):

(1.1)  $G$  is connected  $\Rightarrow \forall s \in S \forall m \in M : s$  can see  $m$  (indirectly)

Let  $G$  be connected,  $s^* \in S, m^* \in M$  and  $s^*$  cannot see  $m^*$  (indirectly). Since  $s^*$  cannot see  $m^*$  indirectly, it follows from the definitions that there is no path in  $G$  from  $s^*$  to  $m^*$ . Since  $G$  is an undirected graph, it therefore follows that  $G$  is not connected which is a contradiction to the assumptions. Hence, the claim is true.

(1.2)  $G$  is connected  $\Leftarrow \forall s \in S \forall m \in M : s$  can see  $m$  (indirectly)

Let  $\forall$  sensor  $s \forall$  marker  $m : s$  can see  $m$  (indirectly). Assuming  $G$  is not connected, it follows by definition:  $\exists s^* \in S, m^* \in M : \text{there is no path between } s^* \text{ and } m^*$ . Using the definition of the “sees-indirectly” relation it follows  $\exists s^* \in S, m^* \in M : \overline{s^* \text{ sees } m^* \text{ indirectly}}$ , which is a contradiction to the assumptions. Hence, the claim is true.

It follows:  $G$  is connected  $\Leftrightarrow \forall$  sensor  $s \forall$  marker  $m : s$  can see  $m$  (indirectly).

Calculations to express any sensor  $s$  in the coordinate frame any marker  $m$  (claim 2):

$t_{m,s}$ : position of marker  $m$  in sensor  $s$ ' coordinate-frame

$R_{m,s}$ : orientation of marker  $m$  in sensor  $s$ ' coordinate-frame

$t_{m,n}$ : position of marker  $m$  in marker  $n$ 's coordinate-frame

$R_{m,n}$ : orientation of marker  $m$  in marker  $n$ 's coordinate-frame

Due to the calibration procedure we are given  $t_{m,s}$  and  $R_{m,s}$  for all sensor-marker-combinations for which the sensor  $s$  sees marker  $m$ , i.e. for which holds:  $(s, m) \in E$ .

Case 1:  $(s, m) \in E$

The orientation of sensor  $s$  can be expressed in the marker  $m$ 's coordinate-frame by  $R_{s,m} = R_{m,s}^T$ . Correspondingly, the position of sensor  $s$  can be expressed in marker  $m$ 's coordinate-frame by  $t_{s,m} = -R_{m,s}^T t_{m,s}$ .

Case 2:  $(s, m) \notin E$

Let  $p = (s_1 = s, m_1, s_2, m_2, \dots, s_{N-1}, m_{N-1}, s_N, m_N = m)$  be a path from sensor  $s$  to marker  $m$  in  $G$  with  $m_i \in M$ ,  $s_i \in S$ . Hence,  $(s_i, m_i) \in E$  for  $i = 1 \dots N$  and  $(s_{i+1}, m_i) \in E$  for  $i = 1 \dots N - 1$ . Due to the calibration procedure we are given  $t_{m_i, s_i}$ ,  $t_{m_i, s_{i+1}}$ ,  $R_{m_i, s_i}$  and  $R_{m_i, s_{i+1}}$ . Using the considerations for the first case we can easily calculate  $t_{s_i, m_i}$  and  $R_{s_i, m_i}$ . We are looking for  $t_{s, m} = t_{s_1, m_N}$  and  $R_{s, m} = R_{s_1, m_N}$ .

1) Calculate for  $i = 1 \dots N - 1$ :

$$t_{m_i, m_{i+1}} = R_{s_{i+1}, m_{i+1}} t_{m_i, s_{i+1}} + t_{s_{i+1}, m_{i+1}}$$

$$R_{m_i, m_{i+1}} = R_{s_{i+1}, m_{i+1}} R_{m_i, s_{i+1}}$$

2) Calculate for  $j = N - 2 \dots 1$  (in that order):

$$R_{m_j, m_N} = R_{m_{j+1}, m_N} R_{m_j, m_{j+1}}$$

$$t_{m_j, m_N} = R_{m_{j+1}, m_N} t_{m_j, m_{j+1}} + t_{m_{j+1}, m_N}$$

3) Calculate:

$$R_{s, m} = R_{s_1, m_N} = R_{m_1, m_N} R_{s_1, m_1}$$

$$t_{s, m} = t_{s_1, m_N} = R_{m_1, m_N} t_{s_1, m_1} + t_{m_1, m_N}$$
